# Supplementary material
Source: PubMed Central journal article supplement (PMC7855013)

**Supplementary Table I. Study Measures**

|                                         | <b>EHR</b> | <b>Patient Survey</b> | <b>Details</b>                                                                                                                                                                                                                                                                                                                                                                                                                                                                                                                                                                                                                                                                                                                                                                    |
|-----------------------------------------|------------|-----------------------|-----------------------------------------------------------------------------------------------------------------------------------------------------------------------------------------------------------------------------------------------------------------------------------------------------------------------------------------------------------------------------------------------------------------------------------------------------------------------------------------------------------------------------------------------------------------------------------------------------------------------------------------------------------------------------------------------------------------------------------------------------------------------------------|
| <b>Sociodemographic Characteristics</b> |            |                       |                                                                                                                                                                                                                                                                                                                                                                                                                                                                                                                                                                                                                                                                                                                                                                                   |
| Age                                     | X          | X                     | Age in years at the time of discharge                                                                                                                                                                                                                                                                                                                                                                                                                                                                                                                                                                                                                                                                                                                                             |
| Gender                                  | X          | X                     | Male vs. Female                                                                                                                                                                                                                                                                                                                                                                                                                                                                                                                                                                                                                                                                                                                                                                   |
| Race                                    | X          | X                     | White vs. Non-White (i.e. Black, Hispanic, Asian, and others)                                                                                                                                                                                                                                                                                                                                                                                                                                                                                                                                                                                                                                                                                                                     |
| Education level                         |            | X                     | High school education or less vs. more than high school education                                                                                                                                                                                                                                                                                                                                                                                                                                                                                                                                                                                                                                                                                                                 |
| Employment status                       |            | X                     | Currently working or not                                                                                                                                                                                                                                                                                                                                                                                                                                                                                                                                                                                                                                                                                                                                                          |
| Insurance status                        | X          | X                     | Currently insured, Medicaid only, uninsured                                                                                                                                                                                                                                                                                                                                                                                                                                                                                                                                                                                                                                                                                                                                       |
| <b>Psychosocial Factors</b>             |            |                       |                                                                                                                                                                                                                                                                                                                                                                                                                                                                                                                                                                                                                                                                                                                                                                                   |
| Marital status                          |            | X                     | Currently married, never married, divorced, or widowed                                                                                                                                                                                                                                                                                                                                                                                                                                                                                                                                                                                                                                                                                                                            |
| Social support                          |            | X                     | <p>Assessed by the following five questions:</p> <ul style="list-style-type: none"> <li>• Is there someone available to you whom you can count on to listen to you when you need to talk?</li> <li>• Is there someone available to you to give you good advice about a problem?</li> <li>• Is there someone available to you who shows you love and affection?</li> <li>• Can you count on anyone to provide you with emotional support (talking over problems or helping make a difficult decision)?</li> <li>• Do you have as much contact as you would like with someone you feel close to, someone in whom you can trust and confide?</li> </ul> <p>Response options: a 5-point Likert Scale (0 = None of the time, to 4 = All of the time).</p> <p>A summary scale: 0-20</p> |
| Life stressors                          |            | X                     | <p>Assessed based on the following three questions:</p> <p>How often do you feel stressed</p> <ul style="list-style-type: none"> <li>• at home;</li> <li>• because of financial concerns;</li> <li>• because of their health</li> </ul> <p>Response options: a 4-point Likert Scale (0= None of the time, to 3 = All of the time)</p> <p>A summary scale: 0-9</p>                                                                                                                                                                                                                                                                                                                                                                                                                 |
| Depressive symptoms                     |            | X                     | <p>Measured by the 8-item version of the CES-D Scale</p> <p>A summary scale: 0-24</p>                                                                                                                                                                                                                                                                                                                                                                                                                                                                                                                                                                                                                                                                                             |
| Self-efficacy                           |            | X                     | <p>Measured based on how much participants agreed with the following four statements</p> <ul style="list-style-type: none"> <li>• Keeping healthy depends on things that I do myself</li> <li>• There are certain things I can do for myself to reduce the risk of a future heart attack or heart problem</li> <li>• I work hard at trying to stay healthy</li> <li>• When I am sick, getting better is pretty much in the doctor's hands</li> </ul>                                                                                                                                                                                                                                                                                                                              |

|                                          |   |   |                                                                                                                                                                                                                                                                                                                                                                                                                |
|------------------------------------------|---|---|----------------------------------------------------------------------------------------------------------------------------------------------------------------------------------------------------------------------------------------------------------------------------------------------------------------------------------------------------------------------------------------------------------------|
|                                          |   |   | Response options: a 5-point Likert Scale (0= Strongly disagree, to 3 = Strongly agree)<br>A summary scale: 0-16                                                                                                                                                                                                                                                                                                |
| Health literacy                          |   | X | Measured based on how confident participants are filling out forms by themselves<br>Response options: a 4-point Likert Scale (1= Very confident, to 4 = Not confident at all)<br>A dichotomized variable: adequate health literacy (categories 1 and 2) or low (categories 3 and 4)                                                                                                                            |
| <b>Behavioral Factors</b>                |   |   |                                                                                                                                                                                                                                                                                                                                                                                                                |
| Smoking history                          | X | X | Current/past smoker or not                                                                                                                                                                                                                                                                                                                                                                                     |
| Alcohol consumption                      |   | X | Current drinker or not                                                                                                                                                                                                                                                                                                                                                                                         |
| Medication adherence                     |   | X | Assessed based on the following question:<br><ul style="list-style-type: none"> <li>In the past year, how often have you not taken a medication that your doctor prescribed because of cost, side-effects, or any other reason?</li> </ul> Response options: a 5-point Likert Scale (1= Always, to 5 = Never)<br>A dichotomized variable: non-adherence (categories 1, 2, 3) or adherence (categories 4 and 5) |
| <b>Health-Related Factors</b>            |   |   |                                                                                                                                                                                                                                                                                                                                                                                                                |
| Self-rated health                        |   | X | Poor vs. at least fair                                                                                                                                                                                                                                                                                                                                                                                         |
| Body mass index                          | X | X | Continuous measure                                                                                                                                                                                                                                                                                                                                                                                             |
| ADL                                      |   | X | Assessed based on six items: bathing, dressing, toileting, transferring, continence, and feeding<br>Response options: a 4-point Likert Scale (1= Not at all difficult, to 4 = Very difficult/Cannot do)<br>A dichotomized variable: any limitation (categories 2,3,4 in at least one of the six items) or not                                                                                                  |
| <b>Disease Diagnoses</b>                 |   |   |                                                                                                                                                                                                                                                                                                                                                                                                                |
| Hypertension                             | X |   | ICD-9: 401; ICD-10: I10                                                                                                                                                                                                                                                                                                                                                                                        |
| Diabetes                                 | X |   | ICD-9: 250; ICD-10: E10, E11                                                                                                                                                                                                                                                                                                                                                                                   |
| Heart failure                            | X |   | ICD-9: 398.91, 428; ICD-10: I50                                                                                                                                                                                                                                                                                                                                                                                |
| Acute MI                                 | X |   | ICD-9: 410; ICD-10: I21                                                                                                                                                                                                                                                                                                                                                                                        |
| Atrial fibrillation                      | X |   | ICD-9: 427.31; ICD-10: I48                                                                                                                                                                                                                                                                                                                                                                                     |
| Stroke                                   | X |   | ICD-9: 434.91; ICD-10: I63.9                                                                                                                                                                                                                                                                                                                                                                                   |
| <b>Healthcare Access and Utilization</b> |   |   |                                                                                                                                                                                                                                                                                                                                                                                                                |
| Difficulty accessing care                |   | X | Measured by the following question:<br><ul style="list-style-type: none"> <li>Overall, how difficult is it for you to get routine medical care when needed?</li> </ul> Response options: a 5-point Likert Scale (1= Extremely difficult, to 5 = No problem at all)<br>A dichotomized variable: Difficult (categories 1, 2, 3) or not difficult (categories 4 and 5)                                            |
| Length of stay                           | X |   | In days                                                                                                                                                                                                                                                                                                                                                                                                        |
| Prior admissions in the past year        | X | X | Any prior admissions in the past year vs. none                                                                                                                                                                                                                                                                                                                                                                 |

Abbreviations: ADL: Activities of Daily Living; CES-D: Center for Epidemiologic Studies Depression; ICD: International Classification of Diseases; MI: Myocardial infarction.

**Supplementary Table II.** Major Index Admission Conditions by Perceived Risk of 30-Day Readmission (N = 730)

|                                   | <b>Overall<br/>(N = 730)</b> | <b>Low<br/>Perceived Risk<br/>(N = 501)</b> | <b>High<br/>Perceived Risk<br/>(N = 229)</b> | <b>P value</b> |
|-----------------------------------|------------------------------|---------------------------------------------|----------------------------------------------|----------------|
| <b>Index Admission Conditions</b> |                              |                                             |                                              |                |
| Heart failure                     | 268 (36.71)                  | 175 (34.93)                                 | 93 (40.61)                                   | 0.140          |
| Acute myocardial infarction       | 89 (12.19)                   | 65 (12.97)                                  | 24 (10.48)                                   | 0.339          |
| Atrial fibrillation               | 147 (20.14)                  | 109 (21.76)                                 | 38 (16.59)                                   | 0.107          |
| Angina                            | 115 (15.75)                  | 78 (15.57)                                  | 37 (16.16)                                   | 0.840          |
| Chest pain                        | 92 (12.60)                   | 62 (12.38)                                  | 30 (13.10)                                   | 0.784          |
| Heart valve disorders             | 67 (9.18)                    | 52 (10.38)                                  | 15 (6.55)                                    | 0.096          |
| Shortness of breath               | 111 (15.21)                  | 72 (14.37)                                  | 39 (17.03)                                   | 0.353          |
| Renal disease                     | 28 (3.84)                    | 24 (4.79)                                   | 4 (1.75)                                     | 0.047          |
| Pulmonary heart disease           | 22 (3.01)                    | 14 (2.79)                                   | 8 (3.49)                                     | 0.608          |

Note: Categorical variables reported as n (%) and continuous variables reported as mean (SD) or median (IQR).

The conditions reported in the table accounted for 80.3% of the index admissions. Approximately 25% of patients had more than one index admission condition listed. Other index admission conditions included syncope and collapse, benign prostatic hyperplasia, and other diseases.

**Supplementary Table III.** Factors Associated with the Perception of High Risks of Readmission (N = 730)

| <b>Variables</b>                          | <b>Adjusted OR (95% CI)</b> | <b>P value</b> |
|-------------------------------------------|-----------------------------|----------------|
| Age (years)                               | 0.99 (0.98-1.01)            | 0.434          |
| Female                                    | 0.69 (0.52-0.92)            | 0.012          |
| Non-white                                 | 1.05 (0.75-1.47)            | 0.768          |
| H.S. or less education                    | 1.50 (1.01-2.22)            | 0.045          |
| Not currently working                     | 0.67 (0.37-1.21)            | 0.184          |
| Insurance status (ref: currently insured) |                             |                |
| Medicaid only                             | 0.86 (0.38-1.93)            | 0.713          |
| Uninsured                                 | 1.34 (0.48-3.71)            | 0.573          |
| Marital status (ref: currently married)   |                             |                |
| Never married                             | 0.80 (0.46-1.40)            | 0.429          |
| Divorced                                  | 0.71 (0.49-1.03)            | 0.068          |
| Widowed                                   | 0.78 (0.49-1.24)            | 0.295          |
| Social support                            | 0.98 (0.94-1.03)            | 0.385          |
| Life stressors                            | 1.22 (1.11-1.34)            | 0.000          |
| CES-D symptoms                            | 1.00 (0.96-1.04)            | 0.953          |
| Self-efficacy                             | 0.93 (0.84-1.04)            | 0.217          |
| Inadequate health literacy                | 1.11 (0.78-1.58)            | 0.567          |
| Current or past smoker                    | 0.68 (0.45-1.03)            | 0.069          |
| Current drinker                           | 0.79 (0.55-1.14)            | 0.204          |
| Medication non-adherence                  | 0.97 (0.72-1.32)            | 0.854          |
| Poor self-rated health                    | 1.89 (1.13-3.16)            | 0.015          |
| Any ADL limitations                       | 2.06 (1.35-3.15)            | 0.001          |
| Body mass index                           | 0.98 (0.96-1.00)            | 0.052          |
| Hypertension                              | 0.83 (0.53-1.30)            | 0.416          |
| Diabetes                                  | 0.86 (0.55-1.34)            | 0.499          |
| Heart Failure                             | 0.94 (0.71-1.26)            | 0.696          |
| Acute MI                                  | 0.98 (0.50-1.92)            | 0.949          |
| Atrial fibrillation                       | 1.31 (0.91-1.88)            | 0.147          |
| Stroke                                    | 1.11 (0.66-1.87)            | 0.690          |
| Difficulty in accessing to care           | 1.04 (0.67-1.60)            | 0.865          |
| Length of stay                            | 1.00 (0.99-1.01)            | 0.822          |
| Any admissions in the past year           | 1.41 (1.04-1.91)            | 0.028          |

Abbreviations: ADL: Activities of Daily Living; CES-D: Center for Epidemiologic Studies Depression; CI: Confidence Interval; H.S.: High school; MI: Myocardial infarction; OR: Odds ratio; SD: Standard deviation  
 Note: *P* values are based on fully-adjusted logistic regression models.

**Supplementary Table IV.** Association between Perceived Risks of Readmission and 30-day Composite Outcome (N = 730)

| <b>Variables</b>                          | <b>Unadjusted<br/>OR (95% CI)</b> | <b>P value</b> | <b>Adjusted<br/>OR (95% CI)</b> | <b>P value</b> |
|-------------------------------------------|-----------------------------------|----------------|---------------------------------|----------------|
| Perceived risk (high)                     | 1.83 (1.25-2.69)                  | 0.002          | 1.41 (0.96-2.07)                | 0.080          |
| Age (years)                               | 1.00 (0.99-1.01)                  | 0.991          | 1.00 (0.98-1.01)                | 0.840          |
| Female                                    | 1.28 (0.88-1.84)                  | 0.193          | 1.07 (0.68-1.68)                | 0.781          |
| Non-white                                 | 1.35 (1.02-1.80)                  | 0.035          | 1.40 (0.93-2.11)                | 0.102          |
| H.S. or less education                    | 1.14 (0.72-1.80)                  | 0.582          | 0.88 (0.46-1.67)                | 0.691          |
| Not currently working                     | 0.54 (0.38-0.77)                  | 0.001          | 0.74 (0.45-1.22)                | 0.239          |
| Insurance status (ref: currently insured) |                                   |                |                                 |                |
| Medicaid only                             | 1.11 (0.56-2.22)                  | 0.762          | 0.70 (0.25-1.98)                | 0.504          |
| Uninsured                                 | 1.06 (0.44-2.54)                  | 0.900          | 1.08 (0.32-3.62)                | 0.901          |
| Marital status (ref: currently married)   |                                   |                |                                 |                |
| Never married                             | 1.58 (1.11-2.24)                  | 0.011          | 1.42 (0.87-2.34)                | 0.164          |
| Divorced                                  | 0.93 (0.46-1.86)                  | 0.839          | 0.80 (0.38-1.68)                | 0.549          |
| Widowed                                   | 1.87 (1.27-2.77)                  | 0.002          | 1.50 (0.86-2.61)                | 0.153          |
| Social support                            | 0.97 (0.93-1.02)                  | 0.196          | 1.00 (0.95-1.06)                | 0.917          |
| Life stressors                            | 1.06 (0.99-1.14)                  | 0.119          | 0.94 (0.84-1.05)                | 0.289          |
| CES-D symptoms                            | 1.07 (1.03-1.12)                  | 0.002          | 1.06 (0.99-1.12)                | 0.078          |
| Self-efficacy                             | 1.02 (0.90-1.16)                  | 0.734          | 1.05 (0.91-1.21)                | 0.492          |
| Inadequate health literacy                | 1.06 (0.65-1.74)                  | 0.805          | 0.84 (0.50-1.42)                | 0.517          |
| Current or past smoker                    | 1.02 (0.73-1.41)                  | 0.924          | 1.07 (0.72-1.61)                | 0.733          |
| Current drinker                           | 0.68 (0.50-0.92)                  | 0.011          | 0.75 (0.56-1.02)                | 0.064          |
| Medication non-adherence                  | 1.12 (0.71-1.79)                  | 0.624          | 1.15 (0.72-1.86)                | 0.553          |
| Poor self-rated health                    | 2.52 (1.87-3.40)                  | 0.000          | 1.99 (1.37-2.89)                | 0.000          |
| Any ADL limitations                       | 1.68 (1.18-2.39)                  | 0.004          | 1.20 (0.80-1.78)                | 0.379          |
| Body mass index                           | 0.98 (0.96-1.00)                  | 0.062          | 0.96 (0.94-0.99)                | 0.006          |
| Hypertension                              | 0.83 (0.61-1.14)                  | 0.261          | 0.96 (0.66-1.39)                | 0.825          |
| Diabetes                                  | 0.97 (0.67-1.38)                  | 0.849          | 0.93 (0.58-1.47)                | 0.747          |
| Heart Failure                             | 1.30 (0.89-1.88)                  | 0.170          | 0.89 (0.51-1.54)                | 0.678          |
| Acute MI                                  | 0.66 (0.41-1.07)                  | 0.093          | 0.70 (0.39-1.25)                | 0.226          |
| Atrial fibrillation                       | 1.06 (0.76-1.48)                  | 0.733          | 1.11 (0.71-1.76)                | 0.643          |
| Stroke                                    | 1.00 (0.57-1.75)                  | 0.994          | 0.87 (0.52-1.48)                | 0.616          |
| Difficulty in accessing to care           | 1.90 (1.24-2.91)                  | 0.003          | 1.76 (1.15-2.70)                | 0.009          |
| Length of stay                            | 1.02 (1.01-1.03)                  | 0.001          | 1.01 (1.00-1.02)                | 0.099          |
| Any admissions in the past year           | 1.91 (1.25-2.93)                  | 0.003          | 1.68 (1.11-2.55)                | 0.015          |

Abbreviations: ADL: Activities of Daily Living; CES-D: Center for Epidemiologic Studies Depression; CI: Confidence Interval; H.S.: High school; MI: Myocardial infarction; OR: Odds ratio; SD: Standard deviation  
 Note: P values are based on logistic regression models for both unadjusted and adjusted ORs .

**Supplementary Figure I.** Kaplan-Meier Plots for Risks of 30-Day Readmission by Perceived Likelihood of Readmission among Patients with Cardiovascular Disease (N = 730)

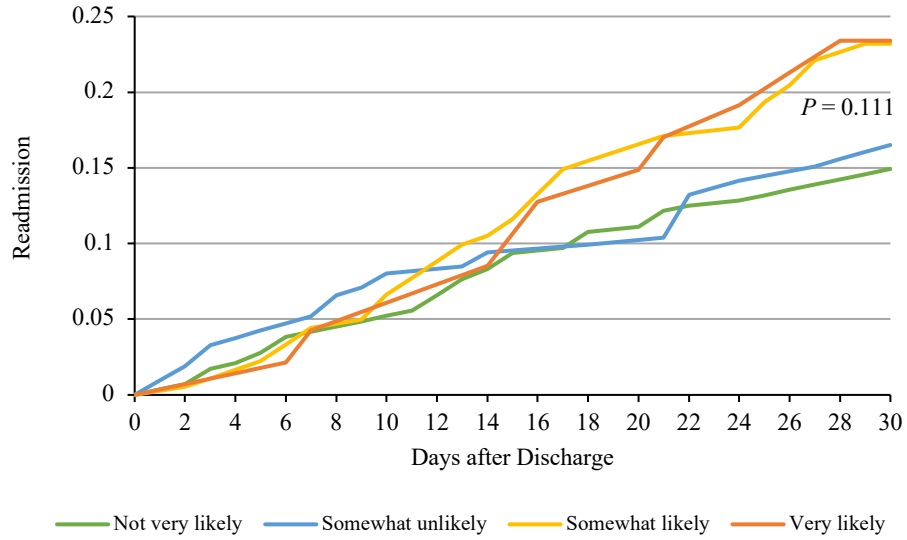

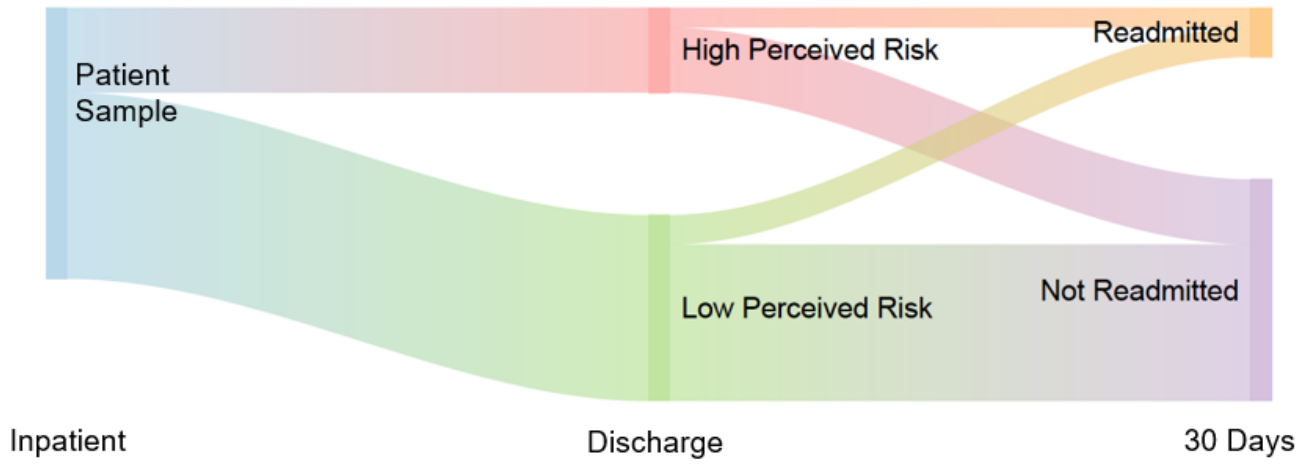

**Supplementary Figure II.** Flowchart of Study Design and Stratification of Study Sample

**Supplementary Figure III.** Kaplan-Meier Plots for Risks of 30-Day Readmission by Perceived Risks of Readmission among Patients with Cardiovascular Disease (N = 730)

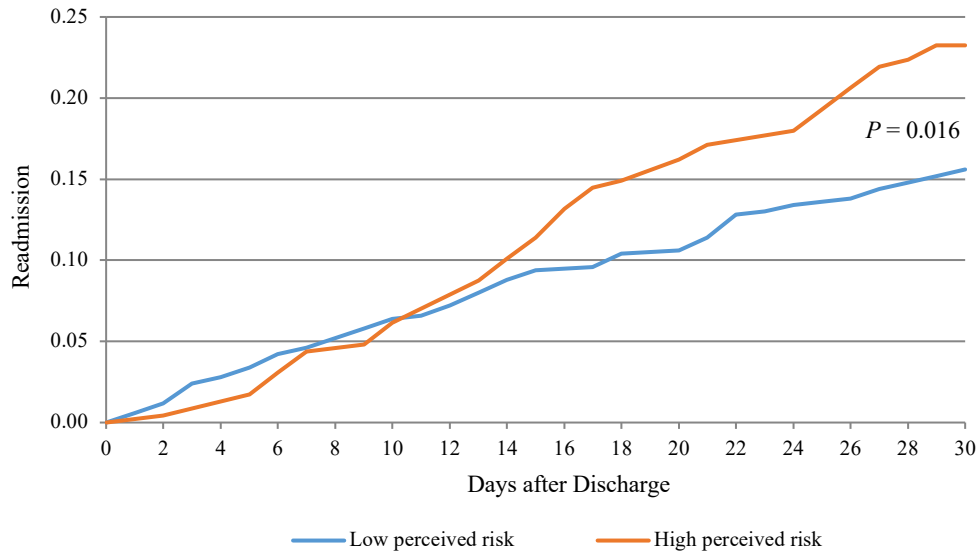

Supplement: NIHMS1640678-supplement-Supplemental_Material_-PDF.pdf [file NIHMS1640678-supplement-Supplemental_Material_-PDF.pdf]
